# Supplementary material for: Genetic Predisposition to Colon and Rectal Adenocarcinoma Is Mediated by a Super-enhancer Polymorphism CoactivatingCD9andPLEKHG6
Source: Oxford University Press journal article supplement (doi:10.1158/1055-9965.epi-19-1116), 2020-01-27
Supplement: 10559965epi191116-sup-228785_2_supp_5929853_q137y3.docx [file 10559965epi191116-sup-228785_2_supp_5929853_q137y3.docx]

Supplementary Table S1. Summary of CRC GWAS loci that identified and replicated in East Asians.

| GWAS loci | tagSNP | Position | LD block |
| --- | --- | --- | --- |
| 1q41 | rs6687758 | 222164948 | 222133118-222204361 |
| 2q32.3 | rs11903757 | 192587204 | 192579683-192589442 |
| 3q26.2 | rs10936599 | 169492101 | 169477506-169528523 |
| 5q31.1 | rs647161 | 134499092 | 134467220-134535627 |
| 6p21.31 | rs1321311 | 36622900 | 36615675-36645466 |
| 8q24.21 | rs10505477 | 128407443 | 128407443-128428061 |
| 8q24.21 | rs6983267 | 128413305 | 128407443-128428061 |
| 8q24.21 | rs7014346 | 128424792 | 128407443-128428061 |
| 10p14 | rs10795668 | 8701219 | 8695637-8719519 |
| 10q22.3 | rs704017 | 80819132 | 80810343-80820431 |
| 10q25.2 | rs11196172 | 114726843 | 114723650-114732882 |
| 11q12.2 | rs1535 | 61597972 | 61539691-61624414 |
| 11q12.2 | rs174537 | 61552680 | 61539691-61624414 |
| 11q12.2 | rs174550 | 61571478 | 61539691-61624414 |
| 11q12.2 | rs4246215 | 61564299 | 61539691-61624414 |
| 11q13.4 | rs3824999 | 74345550 | 74269630-74366514 |
| 11q23.1 | rs3802842 | 111171709 | 111133005-111173290 |
| 12p13.31 | rs10849432 | 6385727 | 6373573-6402340 |
| 12p13.32 | rs10774214 | 4368352 | 4363350-4376494 |
| 12q13.13 | rs11169552 | 51155663 | 51015509-51218323 |
| 14q22.2 | rs4444235 | 54410919 | 54410919-54418411 |
| 15q13.3 | rs16969681 | 32993111 | 32991258-32994843 |
| 15q13.3 | rs4779584 | 32994756 | 32992487-32994843 |
| 16q22.1 | rs9929218 | 68820946 | 68727069-68839263 |
| 17p13.3 | rs12603526 | 800593 | 790803-800593 |
| 18q21.1 | rs4939827 | 46453463 | 46450976-46457463 |
| 18q21.1 | rs7229639 | 46450976 | 46442183-46457463 |
| 19q13.11 | rs10411210 | 33532300 | 33530200-33558085 |
| 19q13.2 | rs1800469 | 41860296 | 41845872-41883198 |
| 19q13.2 | rs2241714 | 41869392 | 41845872-41883198 |
| 20p12.3 | rs2423279 | 7812350 | 7720594-7863999 |
| 20p12.3 | rs4813802 | 6699595 | 6693128-6710434 |
| 20p12.3 | rs961253 | 6404281 | 6361948-6406102 |
| 20q13.33 | rs4925386 | 60921044 | 60900481-60943791 |

Abbreviations: GWAS, genome-wide association study; SNP, single nucleodie polymorphism; LD, linkage disequilibrium.
