# Supplementary material for: Genetic Predisposition to Colon and Rectal Adenocarcinoma Is Mediated by a Super-enhancer Polymorphism CoactivatingCD9andPLEKHG6
Source: Oxford University Press journal article supplement (doi:10.1158/1055-9965.epi-19-1116), 2020-01-27
Supplement: 10559965epi191116-sup-228785_2_supp_5929854_q1v7yv.docx [file 10559965epi191116-sup-228785_2_supp_5929854_q1v7yv.docx]

Supplementary Table S2. The characteristics of the study population in three stages.

|  | Stage 1 | | | |  | Stage 2 | | | |  | Combined Stage | | | |
| --- | --- | --- | --- | --- | --- | --- | --- | --- | --- | --- | --- | --- | --- | --- |
|  | Case No.(%) | Control No.(%) | *χ2* | *P* |  | Case No.(%) | Control No.(%) | *χ2* | *P* | Case No.(%) | Control No.(%) | *χ2* | *P* |
| Total | 757 | 755 |  |  |  | 4172 | 6328 |  |  |  | 4929 | 7083 |  |  |
| Sex |  |  | 0.237 | 0.627a |  |  |  | 1.145 | 0.285a |  |  |  | 0.900 | 0.343a |
| Male | 458 (60.5) | 466 (61.7) |  |  |  | 2474 (59.3) | 3686 (58.2) |  |  |  | 2932 (59.5) | 4152 (58.6) |  |  |
| Female | 299 (39.5) | 289 (38.3) |  |  |  | 1698 (40.7) | 2642 (41.8) |  |  |  | 1997 (40.5) | 2931 (41.4) |  |  |
| Age (Mean ± SD) | 58.9±11.7 | 59.4±10.5 |  | 0.335b |  | 59.1±11.9 | 59.3±11.0 |  | 0.061b |  | 59.1±11.8 | 59.4±10.9 |  | 0.157b |
| Agegroup |  |  | 0.286 | 0.963a |  |  |  | 4.247 | 0.236a |  |  |  | 4.199 | 0.241a |
| ≦ 50 | 176 (23.2) | 180 (23.8) |  |  |  | 920 (22.1) | 1484 (23.5) |  |  |  | 1096 (22.2) | 1664 (23.5) |  |  |
| 51 - 60 | 222 (29.3) | 215 (28.5) |  |  |  | 1333 (32.0) | 1959 (31.0) |  |  |  | 1555 (31.5) | 2174 (30.7) |  |  |
| 61 - 70 | 232 (30.6) | 228 (30.2) |  |  |  | 1227 (29.4) | 1799 (28.4) |  |  |  | 1459 (29.6) | 2027 (28.6) |  |  |
| ≧ 71 | 127 (16.8) | 132 (17.5) |  |  |  | 692 (16.6) | 1085 (17.1) |  |  |  | 819 (16.6) | 1217 (17.2) |  |  |
| Smoking status |  |  | 4.738 | **0.030**a |  |  |  | 8.156 | **0.004**a |  |  |  | 9.823 | **0.002**a |
| Non-smoker | 518 (68.4) | 555 (73.5) |  |  |  | 2668 (64.0) | 4218 (66.7) |  |  |  | 3186 (64.6) | 4773 (67.4) |  |  |
| Smoker | 239 (31.6) | 200 (26.5) |  |  |  | 1504 (36.0) | 2110 (33.3) |  |  |  | 1743 (35.4) | 2310 (32.6) |  |  |
| Drinking status |  |  | 0.070 | 0.791a |  |  |  | 0.283 | 0.595a |  |  |  | 0.096 | 0.757a |
| Non-drinker | 563 (74.4) | 557 (73.8) |  |  |  | 3011 (72.2) | 4597 (72.6) |  |  |  | 3574 (72.5) | 5154 (72.8) |  |  |
| drinker | 194 (25.6) | 198 (26.2) |  |  |  | 1161 (27.8) | 1731 (27.4) |  |  |  | 1355 (27.5) | 1929 (27.2) |  |  |

Abbreviations: SD, standard deviation.

a *P* value was calculated by *χ2* test.

b *P* value was calculated by *t* test.

The nominal significant results were in bold.
