# Supplementary material for: Genetic Predisposition to Colon and Rectal Adenocarcinoma Is Mediated by a Super-enhancer Polymorphism CoactivatingCD9andPLEKHG6
Source: Oxford University Press journal article supplement (doi:10.1158/1055-9965.epi-19-1116), 2020-01-27
Supplement: 10559965epi191116-sup-228785_2_supp_5929855_q127yj.docx [file 10559965epi191116-sup-228785_2_supp_5929855_q127yj.docx]

Supplementary Table S3. Probes, primers, siRNAs and sgRNAs sequences used in the study.

| Electrophoretic mobility shift assay (5'-3') | | |
| --- | --- | --- |
| rs11064124-G | Forward | GAGGTGGGGAAGGTGGGAGTTAGGA |
| Reverse | TCCTAACTCCCACCTTCCCCACCTC |
| rs11064124-A | Forward | GAGGTAGGGAAGGTGGGAGTTAGGA |
| Reverse | TCCTAACTCCCACCTTCCCTACCTC |
| qRT-PCR (5'-3') | | |
| *VDR* | Forward | GTGGACATCGGCATGATGAAG |
| Reverse | GGTCGTAGGTCTTATGGTGGG |
| *CD9* | Forward | TTCCTCTTGGTGATATTCGCCA |
| Reverse | AGTTCAACGCATAGTGGATGG |
| *PLEKHG6* | Forward | GTTCCACCCCTATGTCCAGTA |
| Reverse | TGGGGCTTGATAAGCAAGTCA |
| *ATCB* | Forward | CATGTACGTTGCTATCCAGGC |
| Reverse | CTCCTTAATGTCACGCACGAT |
| siRNAs | | |
| si-VDR | siRNA1 | GCAACCAAGACTACAAGTA |
| siRNA2 | GCTCGAAGTGTTTGGCAAT |
| si-CD9 | siRNA1 | GTGATATTCGCCATTGAAA |
| siRNA2 | TGCTGTCCTTGCCATTGGA |
| si-PLEKHG6 | siRNA1 | GCCGGAAGGAATCCTAAAA |
| siRNA2 | CAACCTGGTCTGAGGAAGA |
| sgRNA |  |  |
| LoVo | L-sgRNA1 | ACAAGGGCGTGACCACCACG |
| R-sgRNA | GACCCAACATTACTCCAGGG |
| HCT116 | L-sgRNA2 | AGGTGATCCCTGCCTCGTGG |
| R-sgRNA | GACCCAACATTACTCCAGGG |
| Chromosome conformation capture assays | | |
| 1 | Forward | CCTGAGGGGTTCGAGCTGGGAAAAGGCACA |
| Reverse | CTACCCTCTTACGCAGGAAATACCACAAAT |
| 2 | Forward | GTTCGAGCTGGGAAAAGGCACAACCACCAT |
| Reverse | CACTGCGACCTCTGCTTCTGTCGTCACATC |
| 3 | Forward | GAGCTGGGAAAAGGCACAACCACCATTATG |
| Reverse | CTGCCTAGACTGCATCCAGGTTTGGGACTG |
| 4 | Forward | CCTGAGGGGTTCGAGCTGGGAAAAGGCACA |
| Reverse | CCAGGTTGGGGTCAGCGGGACTTTATTTGG |
| 5 | Forward | CCTGAGGGGTTCGAGCTGGGAAAAGGCACA |
| Reverse | AGGTTGGGGTCAGCGGGACTTTATTTGGAT |
| 6 | Forward | CCTGAGGGGTTCGAGCTGGGAAAAGGCACA |
| Reverse | CCAGGACATAGAGGGGACTCCAGGAAAAGC |
| 7 | Forward | GAAGCCTGAGGGGTTCGAGCTGGGAAAAGG |
| Reverse | GGCATGAGCCACCGCACCCAACCCAAACAT |
| 8 | Forward | CCATTATGCAGTTTGGGGCTGGTGGGGAGG |
| Reverse | CACTGGGAAGCCGAGGCGGGTGGATCACTT |
| 9 | Forward | CCTGAGGGGTTCGAGCTGGGAAAAGGCACA |
| Reverse | AGATTCATCACAGAAATCACTATCTATGGC |
| 10 | Forward | CAGAAGCCTGAGGGGTTCGAGCTGGGAAAA |
| Reverse | GGCCTAGAAGGTCGTGGGGTACGGGGTGCA |
| 11 | Forward | GTTCGAGCTGGGAAAAGGCACAACCACCAT |
| Reverse | AACCTGCCAAGCGGGGACCCACCCAGGAGT |
| 12 | Forward | CCTGAGGGGTTCGAGCTGGGAAAAGGCACA |
| Reverse | ACTTTTGGTGGGAGAAGACGGTCACATACA |
| 13 | Forward | GTTCGAGCTGGGAAAAGGCACAACCACCAT |
| Reverse | TGAGGCAGGAGAATTGCTTGAACCCAGGAG |
| 14 | Forward | GAAGCCTGAGGGGTTCGAGCTGGGAAAAGG |
| Reverse | GGCAGACGAGATTACCAAAGGGAGGACAAG |
| 15 | Forward | AAGGCACAACCACCATTATGCAGTTTGGGG |
| Reverse | TGAATCGGAGGAAGGTAAGGGAGGGCTGAG |
| 16 | Forward | CCTGAGGGGTTCGAGCTGGGAAAAGGCACA |
| Reverse | TGTGAGGGAGGCTGGTCATAGACAAGGAGA |
| 17 | Forward | CCTGAGGGGTTCGAGCTGGGAAAAGGCACA |
| Reverse | GCCATTTTATAGGCAAATGTCAAAGTGGTG |
| GAPDH | Forward | ACAGTCCATGCCATCACTGCC |
| Reverse | GCCTGCTTCACCACCTTCTTG |
