# Supplementary material for: Genetic Predisposition to Colon and Rectal Adenocarcinoma Is Mediated by a Super-enhancer Polymorphism CoactivatingCD9andPLEKHG6
Source: Oxford University Press journal article supplement (doi:10.1158/1055-9965.epi-19-1116), 2020-01-27
Supplement: 10559965epi191116-sup-228785_2_supp_5929856_q157yj.docx [file 10559965epi191116-sup-228785_2_supp_5929856_q157yj.docx]

Supplementary Table S4. Summary of candidate SNPs obtained from the bioinformatics analysis.

| SNP | Position | LD region | Cell line | Super enhancer | ChIP-seq Peak | TFBS | TF (Effect) |
| --- | --- | --- | --- | --- | --- | --- | --- |
| rs12802128 | chr11:74271172 | 74269630-74366514 | V503 | 74242833-74276106 | 74270276-74271253 | 74271169-74271180 | AP-1 (Lost) |
| rs11064124 | chr12:6381507 | 6373573-6402340 | V503 | 6350598-6390696 | 6380998-6384846 | 6381507-6381521 | VDR (Lost) |
| rs7304348 | chr12:6382039 | 6373573-6402340 | V503 | 6350598-6390696 | 6380998-6384846 | 6382028-6382042 | CREB-A (Gain) |
| s77217438 | chr12:6383226 | 6373573-6402340 | V503 | 6350598-6390696 | 6380998-6384846 | 6383226-6383233 | MZF-1 (Gain) |
| rs984337 | chr12:6383525 | 6373573-6402340 | V503 | 6350598-6390696 | 6380998-6384846 | 6383509-6383536 | Pax-5 (Gain) |
| rs143618146 | chr12:6387936 | 6373573-6402340 | V503 | 6350598-6390696 | 6387057-6390696 | 6387934-6387946 | SP1 (Gain)/ |
|  |  |  |  |  |  | 6387927-6387936 | CNOT3 (Lost) |
| rs73256779 | chr12:6387996 | 6373573-6402340 | V503 | 6350598-6390696 | 6387057-6390696 | 6387996-6388001 | DP-1 (Gain) |
| rs16969816 | chr15:32993645 | 32992487-32994843 | V9M | 32969553-33023486 | 32993468-32994046 | 32993641-32993647 | NKX2B (Lost) |
| rs9783948 | chr19:33532511 | 33530200-33558085 | V400 | 33522355-33556648 | 33532346-33533792 | 33532510-33532515 | ipf1 (Gain) |
| rs2216594 | chr19:33533258 | 33530200-33558085 | V400 | 33522355-33556648 | 33532346-33533792 | 33533253-33533258 | AML1 (Gain) |
|  |  |  |  |  |  | 33533258-33533270 | Ikaros (Lost) |
| rs73585910 | chr19:33539061 | 33530200-33558085 | V400 | 33522355-33556648 | 33538536-33539666 | 33539059-33539065 | NKX2B (Lost) |
| rs73926233 | chr19:33543620 | 33530200-33558085 | V400 | 33522355-33556648 | 33553118-33556648 | 33553984-33553988 | Kid3 (Gain) |
|  |  |  |  |  |  | 33553988-33554002 | HMGI-C (Lost) |
| rs7258173 | chr19:33554109 | 33530200-33558085 | V400 | 33522355-33556648 | 33553118-33556648 | 33554109-33554114 | PMX1 (Lost) |
| rs11879773 | chr19:33554667 | 33530200-33558085 | V400 | 33522355-33556648 | 33553118-33556648 | 33554661-33554675 | HES-1 (Gain) |
| rs2427293 | chr20: 60928724 | 60900481-60943791 | HCT-116 | 60924867-60953811 | 60924867-60927257 | 60925853-60925873 | STAT1(Gain) |
|  |  |  |  |  |  | 60925853-60925862 | Pax-5(Lost) |
| rs714506 | chr20:60938310 | 60900481-60943791 | HCT-116 | 60924867-60953811 | 60935807-60943544 | 60938306-60938319 | SNA (Lost) |
| rs659822 | chr20:60938648 | 60900481-60943791 | HCT-116 | 60924867-60953811 | 60935807-60943544 | 60938645-60938654 | WT1 (Lost) |

Abbreviations: SNP, single nucleodie polymorphism; LD, linkage disequilibrium; ChIP-seq, chromatin immunoprecipitation-sequencing; TFBS, transcription factor binding sites; TF, transcription factor.
