# Supplementary material for: Genetic Predisposition to Colon and Rectal Adenocarcinoma Is Mediated by a Super-enhancer Polymorphism CoactivatingCD9andPLEKHG6
Source: Oxford University Press journal article supplement (doi:10.1158/1055-9965.epi-19-1116), 2020-01-27
Supplement: 10559965epi191116-sup-228785_2_supp_5929857_q197yj.docx [file 10559965epi191116-sup-228785_2_supp_5929857_q197yj.docx]

Supplementary Table S5. Association analyses between individual SNPs and CRC risk in Stage 1.

| SNP | Heterozygous model | |  | Homozygous model | |  | Dominant model | |  | Recessive model | |  | Additive model | |
| --- | --- | --- | --- | --- | --- | --- | --- | --- | --- | --- | --- | --- | --- | --- |
| OR (95% CI) | *P* | OR (95% CI) | *P* | OR (95% CI) | *P* | OR (95% CI) | *P* | OR (95% CI) | *P* |
| rs12802128 | 0.89 (0.65-1.20) | 4.35E-01 |  | 0.88 (0.18-4.39) | 8.72E-01 |  | 0.89 (0.66-1.20) | 4.34E-01 |  | 0.91 (0.18-4.56) | 9.13E-01 |  | 0.89 (0.67-1.19) | 4.43E-01 |
| **rs11064124** | 0.84 (0.68-1.05) | 1.24E-01 |  | 0.64 (0.41-1.01) | 5.68E-02 |  | **0.81 (0.66-1.00)** | **4.88E-02** |  | 0.68 (0.44-1.06) | 9.17E-02 |  | **0.82 (0.70-0.98)** | **2.46E-02** |
| rs7304348 | 0.90 (0.71-1.13) | 3.61E-01 |  | 0.89 (0.67-1.19) | 4.28E-01 |  | 0.90 (0.72-1.11) | 3.17E-01 |  | 0.95 (0.74-1.22) | 6.82E-01 |  | 0.94 (0.81-1.08) | 3.74E-01 |
| rs77217438 | 1.23 (0.99-1.52) | 6.40E-02 |  | 1.25 (0.80-1.97) | 3.29E-01 |  | 1.23 (1.00-1.51) | 5.02E-02 |  | 1.16 (0.74-1.81) | 5.18E-01 |  | 1.17 (0.99-1.39) | 6.34E-02 |
| rs984337 | 1.06 (0.84-1.34) | 6.04E-01 |  | 1.05 (0.78-1.41) | 7.69E-01 |  | 1.06 (0.85-1.32) | 6.01E-01 |  | 1.01 (0.78-1.31) | 9.44E-01 |  | 1.03 (0.89-1.19) | 6.97E-01 |
| rs73256779 | 0.87 (0.70-1.09) | 2.18E-01 |  | 0.82 (0.60-1.12) | 2.15E-01 |  | 0.86 (0.70-1.06) | 1.51E-01 |  | 0.88 (0.66-1.18) | 4.03E-01 |  | 0.90 (0.77-1.04) | 1.48E-01 |
| rs16969816 | 1.09 (0.87-1.38) | 4.59E-01 |  | 1.13 (0.84-1.53) | 4.11E-01 |  | 1.10 (0.89-1.37) | 3.73E-01 |  | 1.08 (0.83-1.41) | 5.73E-01 |  | 1.07 (0.93-1.24) | 3.63E-01 |
| **rs9783948** | **1.26 (1.01-1.57)** | **4.23E-02** |  | 1.20 (0.87-1.65) | 2.71E-01 |  | **1.24 (1.01-1.53)** | **3.98E-02** |  | 1.06 (0.79-1.43) | 6.82E-01 |  | 1.14 (0.98-1.32) | 9.33E-02 |
| rs2216594 | 0.94 (0.76-1.16) | 5.57E-01 |  | 0.72(0.51-1.02) | 6.55E-02 |  | 0.89 (0.73-1.09) | 2.59E-01 |  | 0.75 (0.54-1.04) | 8.31E-02 |  | 0.88 (0.76-1.02) | 9.89E-02 |
| rs73585910 | 0.84 (0.66-1.06) | 1.32E-01 |  | 0.94 (0.56-1.57) | 7.99E-01 |  | 0.85 (0.68-1.05) | 1.48E-01 |  | 0.98 (0.59-1.64) | 9.43E-01 |  | 0.89 (0.74-1.07) | 2.19E-01 |
| rs73926233 | 1.07 (0.85-1.33) | 5.81E-01 |  | 0.52 (0.26-1.02) | 5.86E-02 |  | 1.01 (0.82-1.26) | 9.11E-01 |  | 0.51 (0.26-1.00) | 5.03E-02 |  | 0.95 (0.79-1.16) | 6.22E-01 |
| rs7258173 | 0.92 (0.71-1.19) | 5.39E-01 |  | 0.80 (0.33-1.94) | 6.16E-01 |  | 0.91 (0.71-1.17) | 4.78E-01 |  | 0.81 (0.33-1.97) | 6.37E-01 |  | 0.92 (0.73-1.15) | 4.44E-01 |
| rs11879773 | 0.97 (0.77-1.22) | 7.87E-01 |  | 1.58 (0.76-3.29) | 2.21E-01 |  | 1.00 (0.80-1.25) | 9.81E-01 |  | 1.59 (0.77-3.31) | 2.11E-01 |  | 1.04 (0.85-1.27) | 7.07E-01 |
| rs714506 | 0.84 (0.65-1.08) | 1.68E-01 |  | 1.94 (0.72-5.21) | 1.88E-01 |  | 0.88 (0.68-1.12) | 2.97E-01 |  | 2.01 (0.75-5.39) | 1.65E-01 |  | 0.93 (0.74-1.17) | 5.43E-01 |
| **rs659822** | **0.52 (0.39-0.70)** | **1.53E-05** |  | 0.59 (0.16-2.11) | 4.13E-01 |  | **0.52 (0.39-0.70)** | **1.01E-05** |  | 0.63 (0.18-2.28) | 4.85E-01 |  | **0.55 (0.42-0.72)** | **1.90E-05** |

Abbreviations: OR, odds ratio; 95% CI, 95% confidence interval.

All the *P* values were adjusted by gender, age group, smoking status and drinking status. The nominal significant results were in bold.
