# Supplementary material for: Genetic Predisposition to Colon and Rectal Adenocarcinoma Is Mediated by a Super-enhancer Polymorphism CoactivatingCD9andPLEKHG6
Source: Oxford University Press journal article supplement (doi:10.1158/1055-9965.epi-19-1116), 2020-01-27
Supplement: 10559965epi191116-sup-228785_2_supp_5929858_q1k7yj.docx [file 10559965epi191116-sup-228785_2_supp_5929858_q1k7yj.docx]

Supplementary Table S6. Association analyses between promising SNPs and CRC risk in Stage 2 and Combined Stage.

|  | Stage 2 | | | |  | Combined Stage | | | |
| --- | --- | --- | --- | --- | --- | --- | --- | --- | --- |
| Case No.(%) | Control No.(%) | OR(95%CI) | *P* | Case No.(%) | Control No.(%) | OR(95%CI) | *P* |
| **rs11064124** |  |  |  |  |  |  |  |  |  |
| GG | 2579 (62.8) | 3734 (60.0) | 1.00 |  |  | 3064 (63.0) | 4179 (59.9) | 1.00 |  |
| GA | 1357 (33.1) | 2124 (34.1) | 0.93 (0.85-1.01) | 8.38E-02 |  | 1594 (32.8) | 2384 (34.1) | **0.92 (0.85-0.99)** | **2.66E-02** |
| AA | 168 (4.1) | 369 (5.9) | **0.66 (0.55-0.80)** | **1.70E-05** |  | 203 (4.2) | 419 (6.0) | **0.66 (0.56-0.79)** | **3.35E-06** |
| Dominant model |  |  | **0.89 (0.82-0.96)** | **4.26E-03** |  |  |  | **0.88 (0.81-0.95)** | **6.41E-04** |
| Recessive model |  |  | **0.68 (0.56-0.82)** | **4.60E-05** |  |  |  | **0.68 (0.58-0.81)** | **1.37E-05** |
| Additive model |  |  | **0.88 (0.82-0.94)** | **1.01E-04** |  |  |  | **0.87 (0.82-0.92)** | **8.67E-06** |
| **rs9783948** |  |  |  |  |  |  |  |  |  |
| GG | 1700 (41.2) | 2606 (42.0) | 1.00 |  |  | 1984 (40.8) | 2934 (42.2) | 1.00 |  |
| GA | 1848 (44.8) | 2739 (44.1) | 1.04 (0.95-1.13) | 4.27E-01 |  | 2200 (45.2) | 3058 (44.0) | 1.06 (0.98-1.15) | 1.26E-01 |
| AA | 578 (14.0) | 866 (13.9) | 1.02 (0.91-1.16) | 7.12E-01 |  | 682 (14.0) | 964 (13.8) | 1.05 (0.93-1.17) | 4.51E-01 |
| Dominant model |  |  | 1.03 (0.95-1.12) | 4.37E-01 |  |  |  | 1.06 (0.98-1.14) | 1.30E-01 |
| Recessive model |  |  | 1.01 (0.90-1.13) | 9.29E-01 |  |  |  | 1.02 (0.76-1.37) | 8.88E-01 |
| Additive model |  |  | 1.02 (0.96-1.08) | 5.50E-01 |  |  |  | 1.01 (0.91-1.13) | 8.29E-01 |
| **rs659822** |  |  |  |  |  |  |  |  |  |
| TT | 3397 (84.1) | 5218 (83.3) | 1.00 |  |  | 4069 (84.8) | 5827 (83.0) | 1.00 |  |
| TC | 602 (14.9) | 963 (15.4) | 0.96 (0.86-1.08) | 5.19E-01 |  | 683 (14.2) | 1103 (15.7) | **0.89 (0.80-0.99)** | **2.71E-02** |
| CC | 40 (1.0) | 82 (1.3) | 0.75 (0.51-1.10) | 1.38E-01 |  | 44 (0.9) | 88 (1.3) | 0.72 (0.50-1.03) | 7.06E-02 |
| Dominant model |  |  | 0.95 (0.85-1.06) | 3.24E-01 |  |  |  | **0.88 (0.79-0.97)** | **1.04E-02** |
| Recessive model |  |  | 0.75 (0.52-1.10) | 1.46E-01 |  |  |  | 0.73 (0.51-1.05) | 8.65E-02 |
| Additive model |  |  | 0.94 (0.85-1.04) | 2.03E-01 |  |  |  | **0.88 (0.80-0.96)** | **5.73E-03** |

Abbreviations: OR, odds ratio; 95% CI, 95% confidence interval.

All the *P* values were adjusted by gender, age group, smoking status and drinking status. The nominal significant results were in bold.
