# Supplementary material for: Genetic Predisposition to Colon and Rectal Adenocarcinoma Is Mediated by a Super-enhancer Polymorphism CoactivatingCD9andPLEKHG6
Source: Oxford University Press journal article supplement (doi:10.1158/1055-9965.epi-19-1116), 2020-01-27
Supplement: 10559965epi191116-sup-228785_2_supp_5929859_q1v7yj.docx [file 10559965epi191116-sup-228785_2_supp_5929859_q1v7yj.docx]

Supplementary Table S7. The promoters of 4 genes interacted with Enhancer 4 according to the YY1 HiChIP dataset from HCT116.

| Chr | Promoter | TSS | ENST ID | ENSG ID | Gene | Enhancer 4 | Interacting Region | Promoter Region | Interaction *P* |
| --- | --- | --- | --- | --- | --- | --- | --- | --- | --- |
| chr12 | 6307880-6309880 | 6308880 | ENST00000382518 | ENSG00000010278 | *CD9* | 6380998-6384846 | 6380000-6385000 | 6305000-6310000 | 1.48E-04 |
| chr12 | 6308009-6310009 | 6309009 | ENST00000543916 | ENSG00000010278 | *CD9* | 6380998-6384846 | 6380000-6385000 | 6305000-6310000 | 1.48E-04 |
| chr12 | 6308009-6310009 | 6309009 | ENST00000543916 | ENSG00000010278 | *CD9* | 6380998-6384846 | 6380000-6385000 | 6310000-6315000 | 3.57E-08 |
| chr12 | 6308040-6310040 | 6309040 | ENST00000536586 | ENSG00000010278 | *CD9* | 6380998-6384846 | 6380000-6385000 | 6305000-6310000 | 1.48E-04 |
| chr12 | 6308040-6310040 | 6309040 | ENST00000536586 | ENSG00000010278 | *CD9* | 6380998-6384846 | 6380000-6385000 | 6310000-6315000 | 3.57E-08 |
| chr12 | 6308550-6310550 | 6309550 | ENST00000382519 | ENSG00000010278 | *CD9* | 6380998-6384846 | 6380000-6385000 | 6305000-6310000 | 1.48E-04 |
| chr12 | 6308550-6310550 | 6309550 | ENST00000382519 | ENSG00000010278 | *CD9* | 6380998-6384846 | 6380000-6385000 | 6310000-6315000 | 3.57E-08 |
| chr12 | 6308565-6310565 | 6309565 | ENST00000546073 | ENSG00000010278 | *CD9* | 6380998-6384846 | 6380000-6385000 | 6305000-6310000 | 1.48E-04 |
| chr12 | 6308565-6310565 | 6309565 | ENST00000546073 | ENSG00000010278 | *CD9* | 6380998-6384846 | 6380000-6385000 | 6310000-6315000 | 3.57E-08 |
| chr12 | 6308577-6310577 | 6309577 | ENST00000538834 | ENSG00000010278 | *CD9* | 6380998-6384846 | 6380000-6385000 | 6305000-6310000 | 1.48E-04 |
| chr12 | 6308577-6310577 | 6309577 | ENST00000538834 | ENSG00000010278 | *CD9* | 6380998-6384846 | 6380000-6385000 | 6310000-6315000 | 3.57E-08 |
| chr12 | 6308601-6310601 | 6309601 | ENST00000538418 | ENSG00000010278 | *CD9* | 6380998-6384846 | 6380000-6385000 | 6305000-6310000 | 1.48E-04 |
| chr12 | 6308601-6310601 | 6309601 | ENST00000538418 | ENSG00000010278 | *CD9* | 6380998-6384846 | 6380000-6385000 | 6310000-6315000 | 3.57E-08 |
| chr12 | 6308614-6310614 | 6309614 | ENST00000009180 | ENSG00000010278 | *CD9* | 6380998-6384846 | 6380000-6385000 | 6305000-6310000 | 1.48E-04 |
| chr12 | 6308614-6310614 | 6309614 | ENST00000009180 | ENSG00000010278 | *CD9* | 6380998-6384846 | 6380000-6385000 | 6310000-6315000 | 3.57E-08 |
| chr12 | 6308962-6310962 | 6309962 | ENST00000382515 | ENSG00000010278 | *CD9* | 6380998-6384846 | 6380000-6385000 | 6305000-6310000 | 1.48E-04 |
| chr12 | 6308962-6310962 | 6309962 | ENST00000382515 | ENSG00000010278 | *CD9* | 6380998-6384846 | 6380000-6385000 | 6310000-6315000 | 3.57E-08 |
| chr12 | 6333151-6335151 | 6334151 | ENST00000481267 | ENSG00000010278 | *CD9* | 6380998-6384846 | 6380000-6385000 | 6335000-6340000 | 3.26E-08 |
| chr12 | 6425732-6427732 | 6426732 | ENST00000543000 | ENSG00000008323 | *PLEKHG6* | 6380998-6384846 | 6380000-6385000 | 6425000-6430000 | 1.33E-04 |
| chr12 | 6426908-6428908 | 6427908 | ENST00000535616 | ENSG00000008323 | *PLEKHG6* | 6380998-6384846 | 6380000-6385000 | 6425000-6430000 | 1.33E-04 |
| chr12 | 6426928-6428928 | 6427928 | ENST00000544743 | ENSG00000008323 | *PLEKHG6* | 6380998-6384846 | 6380000-6385000 | 6425000-6430000 | 1.33E-04 |
| chr12 | 6427625-6429625 | 6428625 | ENST00000304581 | ENSG00000008323 | *PLEKHG6* | 6380998-6384846 | 6380000-6385000 | 6425000-6430000 | 1.33E-04 |
| chr12 | 6438033-6440033 | 6439033 | ENST00000537842 | ENSG00000067182 | *TNFRSF1A* | 6380998-6384846 | 6380000-6385000 | 6440000-6445000 | 3.29E-04 |
| chr12 | 6438433-6440433 | 6439433 | ENST00000535038 | ENSG00000067182 | *TNFRSF1A* | 6380998-6384846 | 6380000-6385000 | 6440000-6445000 | 3.29E-04 |
| chr12 | 6438607-6440607 | 6439607 | ENST00000539372 | ENSG00000067182 | *TNFRSF1A* | 6380998-6384846 | 6380000-6385000 | 6440000-6445000 | 3.29E-04 |
| chr12 | 6439405-6441405 | 6440405 | ENST00000366159 | ENSG00000067182 | *TNFRSF1A* | 6380998-6384846 | 6380000-6385000 | 6440000-6445000 | 3.29E-04 |
| chr12 | 6440037-6442037 | 6441037 | ENST00000437813 | ENSG00000067182 | *TNFRSF1A* | 6380998-6384846 | 6380000-6385000 | 6440000-6445000 | 3.29E-04 |
| chr12 | 6441231-6443231 | 6442231 | ENST00000543048 | ENSG00000067182 | *TNFRSF1A* | 6380998-6384846 | 6380000-6385000 | 6440000-6445000 | 3.29E-04 |
| chr12 | 6441241-6443241 | 6442241 | ENST00000440083 | ENSG00000067182 | *TNFRSF1A* | 6380998-6384846 | 6380000-6385000 | 6440000-6445000 | 3.29E-04 |
| chr12 | 6441623-6443623 | 6442623 | ENST00000536194 | ENSG00000067182 | *TNFRSF1A* | 6380998-6384846 | 6380000-6385000 | 6440000-6445000 | 3.29E-04 |
| chr12 | 6441902-6443902 | 6442902 | ENST00000535958 | ENSG00000067182 | *TNFRSF1A* | 6380998-6384846 | 6380000-6385000 | 6440000-6445000 | 3.29E-04 |
| chr12 | 6442085-6444085 | 6443085 | ENST00000538363 | ENSG00000067182 | *TNFRSF1A* | 6380998-6384846 | 6380000-6385000 | 6440000-6445000 | 3.29E-04 |
| chr12 | 6636712-6638712 | 6637712 | ENST00000535804 | ENSG00000010292 | *NCAPD2* | 6380998-6384846 | 6380000-6385000 | 6635000-6640000 | 2.38E-04 |
| chr12 | 6637425-6639425 | 6638425 | ENST00000539885 | ENSG00000010292 | *NCAPD2* | 6380998-6384846 | 6380000-6385000 | 6635000-6640000 | 2.38E-04 |

Abbreviations: TSS, transcription start site; ENST, Ensembl transcript; ENSG, Ensembl gene.
